# Supplementary material
Source: MDPI journal article supplement (https://www.mdpi.com/2072-4292/7/8/10364)
Supplement: s1 [file s1]

Supplementary Information

**Table S1.** Area changes of the four lakes from 2002 to 2013. "-----" in the table denotes a null value. CA is the abbreviation for change area; CR is an acronym for change rate.

| **Period** | **Dongting Lake** | | **Poyang Lake** | | **Chaohu Lake** | | **Taihu Lake** | |
| --- | --- | --- | --- | --- | --- | --- | --- | --- |
| **CA (km²)** | **CR (%)** | **CA (km²)** | **CR (%)** | **CA (km²)** | **CR (%)** | **CA (km²)** | **CR (%)** |
| 2002–2003 | −118.12 | −7.73% | −207.81 | −7.64% | 7.36 | 0.93% | −0.24 | −0.01% |
| 2003–2004 | −71.52 | −5.07% | −130.30 | −5.19% | −8.21 | −1.03% | −2.84 | −0.12% |
| 2004–2005 | −66.53 | −4.97% | ----- | ----- | −3.34 | −0.42% | 2.21 | 0.09% |
| 2005–2006 | −101.18 | −7.95% | 159.09 | 3.34% | −2.49 | −0.32% | ----- | ----- |
| 2006–2007 | ----- | ----- | −20.75 | −0.82% | −4.59 | −0.58% | 6.76 | 0.14% |
| 2007–2008 | −9.01 | −0.38% | −189.57 | −7.52% | 6.15 | 0.79% | 1.11 | 0.05% |
| 2008–2009 | ----- | ----- | −230.06 | −9.87% | 3.01 | 0.38% | 1.01 | 0.04% |
| 2009–2010 | −22.01 | −0.95% | 947.81 | 45.12% | −2.57 | −0.33% | −8.71 | −0.37% |
| 2010–2011 | −71.23 | −6.25% | −752.76 | −24.69% | −6.33 | −0.80% | 1.60 | 0.07% |
| 2011–2012 | ----- | ----- | 724.08 | 31.54% | −3.16 | −0.40% | ----- | ----- |
| 2012–2013 | 7.54 | 0.35% | ----- | ----- | 3.42 | 0.44% | −5.50 | −0.12% |

**Table S2.** Summary description of linear regression.

| **Lake** | **Season** | **a** | **b** | **R2** | **P** | **N** |
| --- | --- | --- | --- | --- | --- | --- |
| Dongting Lake | wet season | −0.168 | 8441.5 | 0.88 | <0.001 | 16 |
| dry season | −0.042 | 2257.7 | 0.32 | 0.012 | 19 |
| Poyang Lake | wet season | 0.069 | 779.2 | 0.11 | 0.171 | 19 |
| dry season | 0.144 | 3866.9 | 0.36 | 0.004 | 21 |
| Chaohu Lake | wet season | 0.001 | 771.6 | 0.01 | 0.624 | 21 |
| dry season | 0.001 | 778 | 0 | 0.921 | 21 |
| Taihu Lake | wet season | −0.009 | 2711.7 | 0.3 | 0.012 | 20 |
| dry season | −0.001 | 2378.2 | 0.04 | 0.409 | 20 |


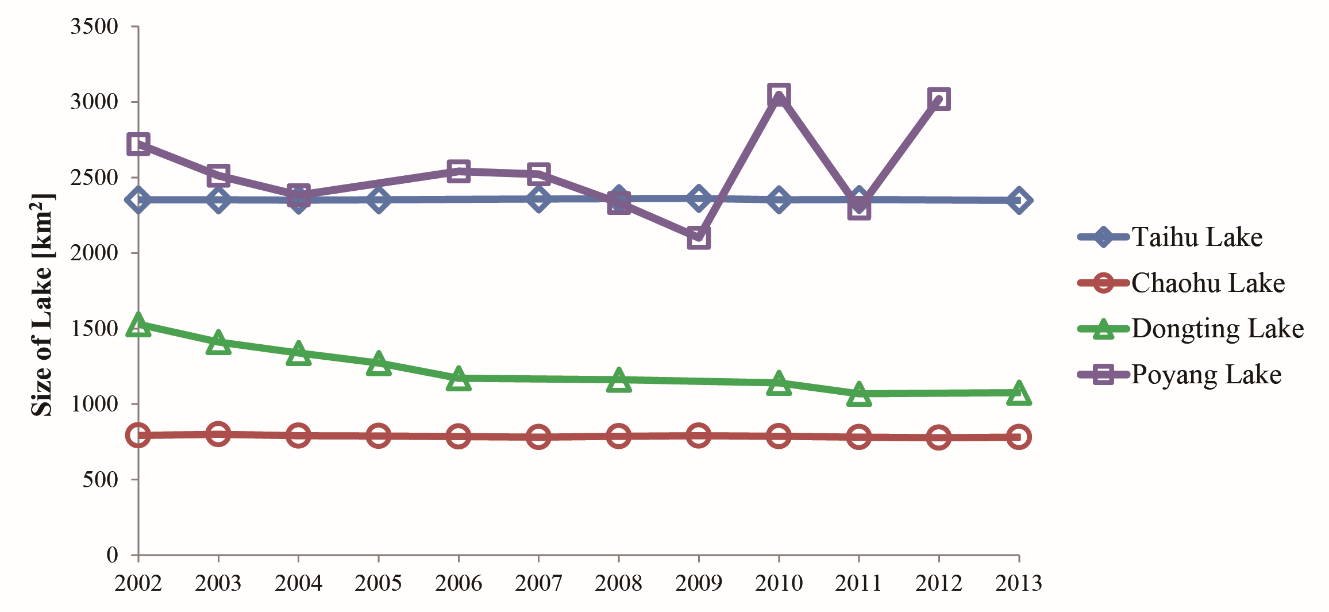


**Figure S1.** The annual average areas of the four lakes from 2002 to 2013.

**Table S3.** The offset distance of the centroid in eight directions for the four lakes from 2002 to 2013.

| **Lakes** | **N** | **NE** | **E** | **SE** | **S** | **SW** | **W** | **NW** |
| --- | --- | --- | --- | --- | --- | --- | --- | --- |
| Dongting Lake | 55,226.8 | 18,667.9 | 0 | 2980.4 | 56,336.4 | 17,042.6 | 932.8 | 3346.9 |
| Poyang Lake | 60,563.4 | 1021.1 | 2430.0 | 33,821.8 | 52,311.5 | 722.1 | 826.7 | 41,026.6 |
| Chaohu Lake | 170.3 | 144.9 | 564.2 | 511.5 | 88.8 | 264.4 | 870.0 | 223.7 |
| Taihu Lake | 20.5 | 509 | 4717.6 | 4096.3 | 64.1 | 67.3 | 5706.6 | 3213.1 |

The units are in meters.

**Table S4.** The data selection of wet and dry seasons in the four lakes from 2002 to 2013.

| **Year** | **Dongting Lake** | | | **Poyang Lake** | | | **Chaohu Lake** | | | **Taihu Lake** | | |
| --- | --- | --- | --- | --- | --- | --- | --- | --- | --- | --- | --- | --- |
| **Season** | **Wet** | **Regular** | **Dry** | **Wet** | **Regular** | **Dry** | **Wet** | **Regular** | **Dry** | **Wet** | **Regular** | **Dry** |
| 2002 | 1 | 1 | 1 | 2 | 0 | 2 | 2 | 0 | 2 | 2 | 0 | 2 |
| 2003 | 2 | 0 | 2 | 2 | 1 | 2 | 3 | 0 | 3 | 2 | 0 | 2 |
| 2004 | 2 | 1 | 2 | 2 | 1 | 2 | 2 | 0 | 2 | 3 | 1 | 3 |
| 2005 | 1 | 1 | 1 | 1 | 0 | 1 | 1 | 0 | 1 | 1 | 1 | 1 |
| 2006 | 1 | 1 | 1 | 1 | 1 | 1 | 3 | 1 | 3 | 1 | 0 | 1 |
| 2007 | 1 | 1 | 1 | 2 | 0 | 2 | 1 | 0 | 1 | 1 | 0 | 1 |
| 2008 | 1 | 1 | 1 | 1 | 0 | 1 | 1 | 0 | 1 | 1 | 0 | 1 |
| 2009 | 0 | 0 | 0 | 1 | 1 | 1 | 2 | 0 | 2 | 2 | 1 | 2 |
| 2010 | 1 | 1 | 1 | 2 | 1 | 2 | 3 | 0 | 3 | 2 | 0 | 2 |
| 2011 | 1 | 1 | 1 | 1 | 1 | 1 | 1 | 1 | 1 | 1 | 0 | 1 |
| 2012 | 1 | 1 | 1 | 2 | 0 | 2 | 1 | 0 | 1 | 2 | 0 | 2 |
| 2013 | 2 | 1 | 2 | 0 | 0 | 0 | 1 | 0 | 1 | 1 | 0 | 1 |

© 2015 by the authors; licensee MDPI, Basel, Switzerland. This article is an open access article distributed under the terms and conditions of the Creative Commons Attribution license (http://creativecommons.org/licenses/by/4.0/).
